# Supplementary material for: A shared core microbiome in soda lakes separated by large distances
Source: PubMed Central journal article supplement (PMC6748926; doi:10.1038/s41467-019-12195-5), 2019-09-17
Supplement: 41467_2019_12195_MOESM1_ESM.pdf [file 41467_2019_12195_MOESM1_ESM.pdf]

## Supplementary Information

### A shared core microbiome in soda lakes separated by large distances

Jackie K. Zorz<sup>1§</sup>, Christine Sharp<sup>1</sup>, Manuel Kleiner<sup>2</sup>, Paul M.K. Gordon<sup>3</sup>, Richard T. Pon<sup>3</sup>, Xiaoli Dong<sup>1</sup>, Marc Strous<sup>1</sup>

<sup>1</sup>Department of Geoscience, University of Calgary, Calgary, AB, T2N 1N4, Canada

<sup>2</sup>Department of Plant and Microbial Biology, North Carolina State University, Raleigh, North Carolina, 27695, USA

<sup>3</sup>Centre for Health Genomics and Informatics, University of Calgary, Calgary, AB, T2N 2T9, Canada

§corresponding author

Email address:

[jacqueline.zorz@ucalgary.ca](mailto:jacqueline.zorz@ucalgary.ca)

## **List of Contents**

### **Supplementary Tables**

Supplementary Table 1 – Aqueous geochemistry of the four lakes

Supplementary Table 2 – List of 16S amplicon OTUs matched with 16S sequences from MAGs

Supplementary Table 3 – List of Gemmatimonadetes reference sequences for Figure 5 phylogenetic tree

Supplementary Table 4 – List of RuBisCO large subunit reference sequences for Figure 5 phylogenetic tree

### **Supplementary Figures**

Supplementary Figure 1 – Expanded Gemmatimonadetes phylogenetic tree

Supplementary Figure 2 – Expanded RuBisCO phylogenetic tree of Gemmatimonadetes representatives



Supplementary Table 2 – List of 16S amplicon OTUs matched with 16S sequences from MAGs

| <i>OTU</i> | <i>Bin</i> | <i>Identity (%)</i> |
|------------|------------|---------------------|
| OTU_792    | A1         | 96.571              |
| OTU_173    | A6         | 99.143              |
| OTU_85     | A7         | 100                 |
| OTU_1      | A2         | 98.571              |
| OTU_34     | Ac2        | 100                 |
| OTU_21     | Ac1        | 100                 |
| OTU_77     | Ac4        | 100                 |
| OTU_56     | B15        | 100                 |
| OTU_78     | B9         | 100                 |
| OTU_8      | B2         | 96.034              |
| OTU_647    | B1         | 99.143              |
| OTU_15     | B6         | 100                 |
| OTU_2      | C1         | 100                 |
| OTU_6      | C7         | 100                 |
| OTU_3      | C5         | 100                 |
| OTU_44     | C4         | 100                 |
| OTU_25     | C6         | 100                 |
| OTU_65     | C8         | 100                 |
| OTU_527    | C9         | 97.714              |
| OTU_117    | Ch1        | 100                 |
| OTU_116    | Ch2        | 100                 |
| OTU_119    | My1        | 100                 |
| OTU_48     | D1         | 100                 |
| OTU_248    | De1        | 97.714              |
| OTU_7      | E1         | 100                 |
| OTU_83     | F2         | 100                 |
| OTU_246    | F1         | 99.714              |
| OTU_161    | G10        | 100                 |
| OTU_11     | G2         | 100                 |
| OTU_40     | G9         | 100                 |
| OTU_33     | G7         | 100                 |
| OTU_12     | G11        | 100                 |
| OTU_203    | Ge2        | 100                 |
| OTU_153    | Ge5        | 98.857              |
| OTU_13     | Ge1        | 100                 |
| OTU_420    | F3         | 100                 |
| OTU_240    | F4         | 100                 |
| OTU_102    | P9         | 100                 |
| OTU_178    | P4         | 100                 |
| OTU_91     | P3         | 100                 |
| OTU_226    | P5         | 100                 |

| <i>OTU</i> | <i>Bin</i> | <i>Identity (%)</i> |
|------------|------------|---------------------|
| OTU_149    | P6         | 100                 |
| OTU_948    | P1         | 96.857              |
| OTU_360    | V1         | 98.286              |
| OTU_14     | S3         | 100                 |
| OTU_75     | S2         | 99.714              |
| OTU_49     | S1         | 100                 |
| OTU_96     | S4         | 98.857              |
| OTU_92     | S6         | 100                 |

Supplementary Table 3 – List of Gemmatimonadetes reference sequences for Figure 5 phylogenetic tree.

| Genbank accession (assembly) | cluster* | sample origin                                             | Class            | Order            | Family            | Genus           |
|------------------------------|----------|-----------------------------------------------------------|------------------|------------------|-------------------|-----------------|
| GCA_000522985.1              | A        | clinical                                                  | Gemmatimonadetes | Gemmatimonadales | Gemmatimonadaceae | Gemmatirosa     |
| GCA_001724275.1              | A        | Cyanide and thiocyanate bioreactor                        | Gemmatimonadetes | Gemmatimonadales | Gemmatimonadaceae | SCN-70-22       |
| GCA_002215645.1              | A        | soil (Laytonville, CA)                                    | Gemmatimonadetes | Gemmatimonadales | Gemmatimonadaceae | 2013-60CM-65-52 |
| GCA_002331565.1              | A        | fresh water (Highgate Springs)                            | Gemmatimonadetes | Gemmatimonadales | Gemmatimonadaceae | Gemmatimonas    |
| GCA_002404335.1              | A        | soil (Axel Heiberg Island, Canada, SRX710613)             | Gemmatimonadetes | Gemmatimonadales | Gemmatimonadaceae | UBA4720         |
| GCA_002483225.1              | A        | biofilm                                                   | Gemmatimonadetes | Gemmatimonadales | Gemmatimonadaceae | Gemmatimonas    |
| GCF_000010305.1              | A        | activated sludge (phosphorus removal)                     | Gemmatimonadetes | Gemmatimonadales | Gemmatimonadaceae | Gemmatimonas    |
| GCF_000695095.2              | A        | fresh water (Swan Lake, China)                            | Gemmatimonadetes | Gemmatimonadales | Gemmatimonadaceae | Gemmatimonas    |
| GCA_001802015.1              | B        | Rifle well CD01 at time point 3 / C; 5m depth; 0.2 filter | Gemmatimonadetes | Gemmatimonadales | GWC2-71-9         | GWC2-71-9       |
| GCA_001915025.1              | B        | soil (Angelo meadow plot)                                 | Gemmatimonadetes | Gemmatimonadales | GWC2-71-9         | 20CM-2-65-7     |
| GCA_001917625.1              | B        | soil (Angelo meadow plot)                                 | Gemmatimonadetes | Gemmatimonadales | GWC2-71-9         | 13-1-40CM-70-15 |
| GCA_001919115.1              | B        | soil (Angelo meadow plot)                                 | Gemmatimonadetes | Gemmatimonadales | GWC2-71-9         | 40CM-2-70-7     |
| GCA_001919865.1              | B        | soil (Angelo meadow plot)                                 | Gemmatimonadetes | Gemmatimonadales | GWC2-71-9         | 20CM-4-69-16    |
| GCA_001919895.1              | B        | soil (Angelo meadow plot)                                 | Gemmatimonadetes | Gemmatimonadales | GWC2-71-9         | 20CM-2-65-7     |
| GCA_001917665.1              | B*       | soil (Angelo meadow plot)                                 | Gemmatimonadetes | Gemmatimonadales | GWC2-71-9         | 20CM-4-69-16    |
| GCA_002291775.1              | C        | seawater (ERX556000)                                      | Gemmatimonadetes | SG8-23           | UBA6960           | UBA822          |
| GCA_002295725.1              | C        | seawater (ERX552242)                                      | Gemmatimonadetes | SG8-23           | UBA6960           | UBA822          |
| GCA_002313235.1              | C        | seawater (ERX556139)                                      | Gemmatimonadetes | SG8-23           | UBA6960           | UBA822          |
| GCA_002450735.1              | C        | seawater (ERX552287 )                                     | Gemmatimonadetes | SG8-23           | UBA6960           | UBA6934         |
| GCA_002712565.1              | C        | seawater (South Atlantic)                                 | Gemmatimonadetes | SG8-23           | UBA6960           | UBA822          |
| GCA_002718595.1              | C        | seawater (South Pacific)                                  | Gemmatimonadetes | SG8-23           | UBA6960           | GCA-2718595     |
| GCA_002731735.1              | C        | seawater (North Pacific Ocean)                            | Gemmatimonadetes | SG8-23           | UBA6960           | UBA822          |
| GCA_003447405.1              | C        | seawater (ERR599072)                                      | Gemmatimonadetes | SG8-23           | UBA6960           | UBA822          |

| Genbank accession (assembly) | cluster* | sample origin                                                | Class               | Order           | Family            | Genus        |
|------------------------------|----------|--------------------------------------------------------------|---------------------|-----------------|-------------------|--------------|
| GCA_003482615.1              | C        | seawater (ERR599115)                                         | Gemmatimonadetes    | SG8-23          | UBA6960           | UBA822       |
| GCA_003445355.1              | C        | seawater                                                     | Gemmatimonadetes    | SG8-23          | UBA6960           | UBA822       |
| GCA_002295045.1              | D        | seawater (ERX555973)                                         | Gemmatimonadetes    | SG8-23          | UBA6960           | UBA887       |
| GCA_002311875.1              | D        | seawater (hydrothermal vent)                                 | Gemmatimonadetes    | SG8-23          | UBA6960           | UBA887       |
| GCA_002313925.1              | D        | seawater (ERX556139)                                         | Gemmatimonadetes    | SG8-23          | UBA6960           | UBA887       |
| GCA_002339385.1              | D        | seawater (ERX556040)                                         | Gemmatimonadetes    | SG8-23          | UBA6960           | UBA2589      |
| GCA_002347035.1              | D        | seawater (ERX555935)                                         | Gemmatimonadetes    | SG8-23          | UBA6960           | UBA2982      |
| GCA_002348265.1              | D        | seawater (ERX555932)                                         | Gemmatimonadetes    | SG8-23          | UBA6960           | UBA2589      |
| GCA_002348465.1              | D        | seawater (ERX555931)                                         | Gemmatimonadetes    | SG8-23          | UBA6960           | UBA2589      |
| GCA_002348665.1              | D        | seawater (ERX555935)                                         | Gemmatimonadetes    | SG8-23          | UBA6960           | UBA887       |
| GCA_002390225.1              | D        | seawater (North Sea subsurface)                              | Gemmatimonadetes    | SG8-23          | UBA6960           | UBA2589      |
| GCA_002501085.1              | D        | seawater (ERX555949)                                         | Gemmatimonadetes    | SG8-23          | UBA6960           | UBA887       |
| GCA_002724575.1              | D        | seawater                                                     | Gemmatimonadetes    | SG8-23          | UBA6960           | UBA887       |
| GCA_002730115.1              | D        | seawater (North Pacific Ocean)                               | Gemmatimonadetes    | SG8-23          | UBA6960           | UBA887       |
| GCA_003486145.1              | D        | seawater (ERR599100)                                         | Gemmatimonadetes    | SG8-23          | UBA6960           | UBA2589      |
| GCA_003447875.1              | D        | seawater (hydrothermal vent)                                 | Gemmatimonadetes    | SG8-23          | UBA6960           | UBA1138      |
| GCA_002346665.1              | Y        | seawater (ERX555935)                                         | Gemmatimonadetes    | SG8-23          | UBA6960           | UBA2988      |
| GCA_002238605.1              |          | marine sponge (Aplysina aerophoba)                           | Gemmatimonadetes    | SG8-23          | BD2-11            | BD2-11       |
| GCA_002238865.1              |          | marine sponge (Aplysina aerophoba)                           | Gemmatimonadetes    | SG8-23          | BD2-11            | bin94        |
| GCA_001780825.1              |          | Rifle well FP-101 under low O2 conditions; 1.2 micron filter | Glassbacteria       | GWA2-58-10      | GWA2-58-10        | GWA2-58-10   |
| GCA_002686955.1              |          | seawater (Arabian Sea)                                       | GCA-2686955         | GCA-2686955     | GCA-2686955       | GCA-2686955  |
| GCA_000012905.2              | outgroup | Rhodobacter sphaeroides                                      | Alphaproteobacteria | Rhodobacterales | Rhodobacteraceae  | Rhodobacter  |
| GCA_000017645.1              | outgroup | Xanthobacter autotrophicus                                   | Alphaproteobacteria | Rhizobiales     | Xanthobacteraceae | Xanthobacter |
| GCA_000688515.1              | outgroup | Afifella pfennigii DSM 17143                                 | Alphaproteobacteria | Rhizobiales     | Rhodobiaceae      | Afifella     |

\* Too few alignment positions, not included in tree

Supplementary Table 4 – List of RuBisCO large subunit reference sequences for Figure 5 phylogenetic tree

| Genbank accession     | Class                         | Order                            | Family             | Genus            | Species/Isolate       |
|-----------------------|-------------------------------|----------------------------------|--------------------|------------------|-----------------------|
| <b>P27997</b>         | Alphaproteobacteria           | Rhodobacterales                  | Rhodobacteraceae   | Rhodobacter      | spaeroides            |
| <b>P23011</b>         | Alphaproteobacteria           | Rhizobiales                      | Xanthobacteraceae  | Xanthobacter     | flavus                |
| <b>P14959</b>         | Ochrophyta:<br>Raphidophyceae | Raphidophyceae<br>incertae sedis | Raphidophyceae     | Olisthodiscus    | luteus                |
| <b>P58348</b>         | Alphaproteobacteria           | Rhizobiales                      | Rhizobiaceae       | Sinorhizobium    | melliloti             |
| <b>WP 051356539.1</b> | Alphaproteobacteria           | Rhizobiales                      | Xanthobacteraceae  | Azorhizobium     | doebereinaerae        |
| <b>WP 037016557.1</b> | Alphaproteobacteria           | Rhizobiales                      |                    |                  | YIM 77505             |
| <b>WP 026380468.1</b> | Alphaproteobacteria           | Rhizobiales                      | Rhodobiaceae       | Afifella         | pfennigii             |
| <b>WP_011500311.1</b> | Methanomicrobia               | Methanosarcinales                | Methanosarcinaceae | Methanococcoides | burtonii DSM 6242     |
| <b>WP_011385076.1</b> | Alphaproteobacteria           | Rhodospirillales                 | Rhodospirillaceae  | Magnetospirillum | magneticum AMB-1      |
| <b>WP_011801368.1</b> | Betaproteobacteria            | Burkholderiales                  | Comamonadaceae     | Polaromonas      | naphthalenivorans CJ2 |
| <b>P04718</b>         | Alphaproteobacteria           | Rhodospirillales                 | Rhodospirillaceae  | Rhodospirillum   | rubrum                |
| <b>AAG37859.1</b>     | Dinophyceae                   | Suessiales                       | Symbiodiniaceae    | Symbiodinium     | sp. GN                |



# Supplementary Figures

Tree scale: 0.1

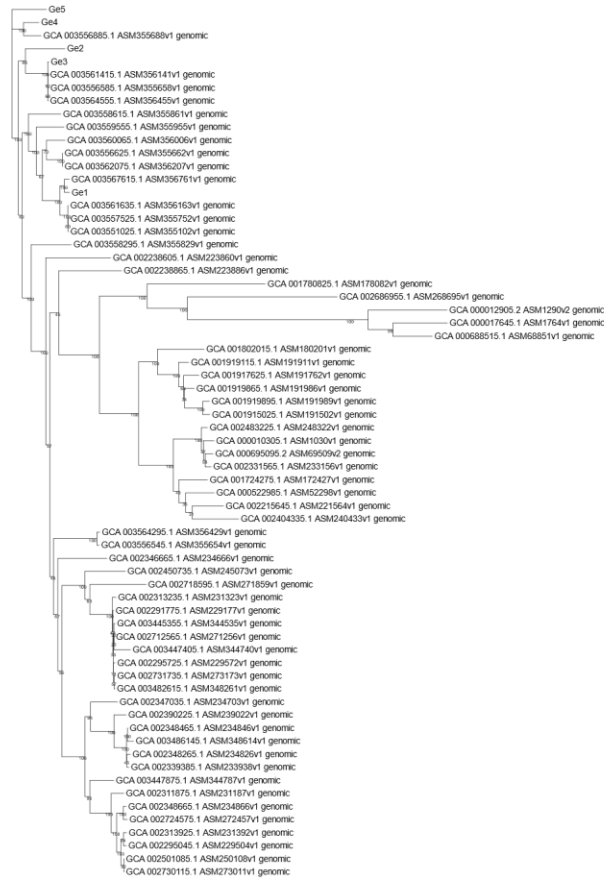

Supplementary Figure 1. Expanded Gemmatimonadetes phylogenetic tree. See also Figure 5a.

Tree scale: 0.1

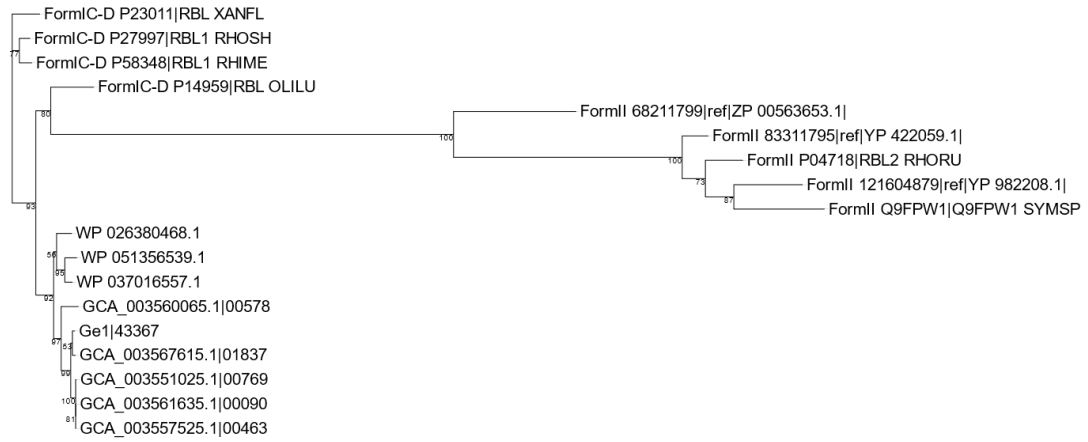

Supplementary Figure 2. Expanded RuBisCO phylogenetic tree of Gemmatimonadetes representatives. See also Figure 5b.
