# Supplementary material for: A shared core microbiome in soda lakes separated by large distances
Source: PubMed Central journal article supplement (PMC6748926; doi:10.1038/s41467-019-12195-5), 2019-09-17
Supplement: 41467_2019_12195_MOESM10_ESM.pdf [file 41467_2019_12195_MOESM10_ESM.pdf]

## Reporting Summary

Nature Research wishes to improve the reproducibility of the work that we publish. This form provides structure for consistency and transparency in reporting. For further information on Nature Research policies, see [Authors & Referees](#) and the [Editorial Policy Checklist](#).

### Statistics

For all statistical analyses, confirm that the following items are present in the figure legend, table legend, main text, or Methods section.

- | n/a                                 | Confirmed                                                                                                                                                                                                                                                                           |
|-------------------------------------|-------------------------------------------------------------------------------------------------------------------------------------------------------------------------------------------------------------------------------------------------------------------------------------|
| <input type="checkbox"/>            | <input checked="" type="checkbox"/> The exact sample size ( $n$ ) for each experimental group/condition, given as a discrete number and unit of measurement                                                                                                                         |
| <input type="checkbox"/>            | <input checked="" type="checkbox"/> A statement on whether measurements were taken from distinct samples or whether the same sample was measured repeatedly                                                                                                                         |
| <input type="checkbox"/>            | <input checked="" type="checkbox"/> The statistical test(s) used AND whether they are one- or two-sided<br><i>Only common tests should be described solely by name; describe more complex techniques in the Methods section.</i>                                                    |
| <input checked="" type="checkbox"/> | <input type="checkbox"/> A description of all covariates tested                                                                                                                                                                                                                     |
| <input type="checkbox"/>            | <input checked="" type="checkbox"/> A description of any assumptions or corrections, such as tests of normality and adjustment for multiple comparisons                                                                                                                             |
| <input checked="" type="checkbox"/> | <input type="checkbox"/> A full description of the statistical parameters including central tendency (e.g. means) or other basic estimates (e.g. regression coefficient) AND variation (e.g. standard deviation) or associated estimates of uncertainty (e.g. confidence intervals) |
| <input type="checkbox"/>            | <input checked="" type="checkbox"/> For null hypothesis testing, the test statistic (e.g. $F$ , $t$ , $r$ ) with confidence intervals, effect sizes, degrees of freedom and $P$ value noted<br><i>Give <math>P</math> values as exact values whenever suitable.</i>                 |
| <input checked="" type="checkbox"/> | <input type="checkbox"/> For Bayesian analysis, information on the choice of priors and Markov chain Monte Carlo settings                                                                                                                                                           |
| <input checked="" type="checkbox"/> | <input type="checkbox"/> For hierarchical and complex designs, identification of the appropriate level for tests and full reporting of outcomes                                                                                                                                     |
| <input type="checkbox"/>            | <input checked="" type="checkbox"/> Estimates of effect sizes (e.g. Cohen's $d$ , Pearson's $r$ ), indicating how they were calculated                                                                                                                                              |

*Our web collection on [statistics for biologists](#) contains articles on many of the points above.*

### Software and code

Policy information about [availability of computer code](#)

#### Data collection

Orion 960 Titrator  
 Varian 725-ES Inductively Coupled Plasma Optical Emission Spectrophotometer  
 Dionex ICS 2000 ion chromatograph  
 MiSeq benchtop sequencer  
 NextSeq 500 System  
 EASY-nLC 1000 Liquid Chromatograph  
 QExactive Plus hybrid quadrupole-Orbitrap mass spectrometer

## Data analysis

EZ 960 software  
 MetaAmp Version 2.0  
 R version 3.5.2  
 vegan package 2.5-4  
 BBnorm (sourceforge.net/projects/bbmap)  
 BBMerge  
 MetaSpades version 3.10.0  
 BMap  
 MetaBat  
 CheckM version 1.0.8  
 Phyloflash2  
 MetaErg (sourceforge.net/projects/metaerg/)  
 fastANI  
 MEGA7  
 GTDBtk (version 0.2.2, database release 86)  
 Proteome Discoverer version 2.0.0.802  
 Calis-P

For manuscripts utilizing custom algorithms or software that are central to the research but not yet described in published literature, software must be made available to editors/reviewers. We strongly encourage code deposition in a community repository (e.g. GitHub). See the Nature Research [guidelines for submitting code & software](#) for further information.

## Data

Policy information about [availability of data](#)

All manuscripts must include a [data availability statement](#). This statement should provide the following information, where applicable:

- Accession codes, unique identifiers, or web links for publicly available datasets
- A list of figures that have associated raw data
- A description of any restrictions on data availability

Amplicon sequences can be found under the Bioproject PRJNA377096. The 16S rRNA sequence Biosamples are: SAMN06456834, SAMN06456843, SAMN06456852, SAMN06456861, SAMN09986741-SAMN09986751, and the 18S rRNA sequence Biosamples are: SAMN09991649-SAMN09991660. The metagenome raw reads and metagenome assembled genomes can also be found under the Bioproject PRJNA377096. The Biosamples for the metagenome raw reads are SAMN10093821-SAMN10093824, and the Biosamples for the MAGs are SAMN10237340-SAMN10237430. The metaproteomics data has been deposited to the ProteomeXchange Consortium via the PRIDE partner repository with the dataset identifier PXD011230.

## Field-specific reporting

Please select the one below that is the best fit for your research. If you are not sure, read the appropriate sections before making your selection.

Life sciences  Behavioural & social sciences  Ecological, evolutionary & environmental sciences

For a reference copy of the document with all sections, see [nature.com/documents/nr-reporting-summary-flat.pdf](https://www.nature.com/documents/nr-reporting-summary-flat.pdf)

## Ecological, evolutionary & environmental sciences study design

All studies must disclose on these points even when the disclosure is negative.

### Study description

In this study we used amplicon sequencing, metaproteomes, and metagenomes to address fundamental questions on the microbial ecology of soda lake mats. Samples were taken from highly productive benthic microbial mats from four lakes in the interior of British Columbia Canada that had high pH (>10), and were highly alkaline. We further explored the concept of microbial biogeography by comparing the metagenome-assembled-genomes from the present study in western Canada, to the metagenome-assembled-genomes from a recently published study of soda lakes in Siberia.

### Research sample

The benthic microbial mats from four highly alkaline soda lakes were chosen for study in this experiment. These mats are of interest due to their high productivity, and also due to their ability to thrive in extremophilic (high alkalinity, high pH) conditions. The recently published study of Siberian soda lakes was chosen for comparison with our data, because it is the only other existing dataset in the literature that targets soda lake systems and contains high quality metagenome-assembled-genomes.

### Sampling strategy

Benthic microbial mats were collected using a small bucket. Mats were immediately frozen in sterile tubes, transported on dry ice, and stored at -80°C within 2 days of sampling. In 2015 and 2017, water samples for aqueous geochemistry were also taken, transported on dry ice, and stored at -80°C until analysis. Transport of samples from the field to the lab on dry ice took less than 48 hours.

### Data collection

CS and JZ collected the samples in the field, extracted DNA, and conducted amplicon sequencing. PG and RP performed metagenome sequencing of select samples. MK performed metaproteomics analysis using the Orbitrap mass spectrometer. MS, XD, and JZ analyzed metagenome and metaproteome data. MS performed the analytical comparison of the present metagenome data to the Siberian metagenomes.

### Timing and spatial scale

Sampling from benthic microbial mats was conducted at the Cariboo Plateau soda lakes each May for four years (2014-2017). The lakes freeze in winter and occasionally dry up in summer, so May was chosen as an intermediate time to sample to ensure that the

lakes were still liquid. Deer Lake was dry in 2016, and thus no sample was taken from the lake that year.

Data exclusions

Reproducibility

Randomization

Blinding

Did the study involve field work?  Yes  No

## Field work, collection and transport

Field conditions

Location

Access and import/export

Disturbance

## Reporting for specific materials, systems and methods

We require information from authors about some types of materials, experimental systems and methods used in many studies. Here, indicate whether each material, system or method listed is relevant to your study. If you are not sure if a list item applies to your research, read the appropriate section before selecting a response.

### Materials & experimental systems

| n/a                                 | Included in the study                                |
|-------------------------------------|------------------------------------------------------|
| <input checked="" type="checkbox"/> | <input type="checkbox"/> Antibodies                  |
| <input checked="" type="checkbox"/> | <input type="checkbox"/> Eukaryotic cell lines       |
| <input checked="" type="checkbox"/> | <input type="checkbox"/> Palaeontology               |
| <input checked="" type="checkbox"/> | <input type="checkbox"/> Animals and other organisms |
| <input checked="" type="checkbox"/> | <input type="checkbox"/> Human research participants |
| <input checked="" type="checkbox"/> | <input type="checkbox"/> Clinical data               |

### Methods

| n/a                                 | Included in the study                           |
|-------------------------------------|-------------------------------------------------|
| <input checked="" type="checkbox"/> | <input type="checkbox"/> ChIP-seq               |
| <input checked="" type="checkbox"/> | <input type="checkbox"/> Flow cytometry         |
| <input checked="" type="checkbox"/> | <input type="checkbox"/> MRI-based neuroimaging |
